# Supplementary material
Source: Research Square preprint supplement (doi:10.21203/rs.3.rs-9573686/v1)
Supplement: Supplementary file 1 [file cf8692406baef7a2759b1189.docx]

**Supplementary Materials**

**Supplementary Table 1** Languages selected for analysis and works used for the study

| Family | Language | Works used for the study |
| --- | --- | --- |
| Indo-European | English | Hoye 1997; Halliday & Matthiessen 2014 |
|  | French | Caffarel 2004, 2006; Price 2008; Banks 2019 |
|  | Spanish | Lavid et al. 2010; Quiroz 2013, 2018 |
| Sino-Tibetan | Chinese | Halliday & McDonald 2004; Li 2007; Yang 2021 |
| Afro-Asiatic | Arabic | Ryding 2005; Bardi 2008 |
| Uralic | Finnish | Shore 1992; Karlsson 2018; White 2019 |
| Austronesian | Tagalog | Schachter & Otanes1972; Martin 1990, 1995, 2004: Martin & Cruz 2018 |
| Austro-Asiatic | Vietnamese | Thai 1998, 2004; Ngo 2021 |
| Niger-Congo | Swahili | Thompson & Schleicher 2001; Mohammed 2001; Mpiranya 2015; Nurse & Devos 2019; Bernander et.al 2022 |
| Turkic | Turkish | Göksel & Kerslake 2005; van Schaaik 2020; Meral & Meral, 2024; |
| Kartvelian | Georgian | Hewitt 2005; Sharashenidze 2014, 2015, 2018; Bolkvadze & Kiziria 2023 |
| Japonic | Japanese | Teruya 1998, 2004, 2007; Narrog 2009 |

Note: The terms of the language families are adopted from Lewis (2009).
